# Supplementary material for: Design of a Novel Axial Gas Pulses Micromixer and Simulations of its Mixing Abilities via Computational Fluid Dynamics
Source: MDPI journal article supplement (doi:10.3390/mi10030205), 2019-03-23
Supplement: s1 [file s1]

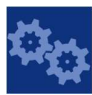

# Supplementary Materials: Design of A Novel Axial Gas Pulses Micromixer and Simulations of Its Mixing Abilities via Computational Fluid Dynamics

Florian Noël <sup>1,2,3</sup>, Christophe A. Serra <sup>3</sup> and Stéphane Le Calvé <sup>1,2,\*</sup>

**Table S1.** Parameters of the simulations.

|                     | Parameter                                      | Value                      | Unit                   |
|---------------------|------------------------------------------------|----------------------------|------------------------|
|                     | Reference Mesh Density                         | 757 <sup>a</sup>           | Nodes cm <sup>-3</sup> |
| Initial Conditions  | Initial scalar value throughout the micromixer | 0                          | -                      |
|                     | Flow rate at the inlet                         | From 1 to 100              | NmL min <sup>-1</sup>  |
| Boundary Conditions | Scalar value at the inlet                      | 1 for gas A<br>0 for gas B | -                      |
|                     | Pressure at the outlet                         | 1                          | atm                    |
|                     | Operating temperature                          | 23                         | °C                     |
|                     | Time step                                      | 1                          | s                      |
|                     | Iterations per time step                       | 5                          | -                      |

<sup>a</sup> The reference mesh density is reported as an average value since higher mesh densities were employed in the microchannels.

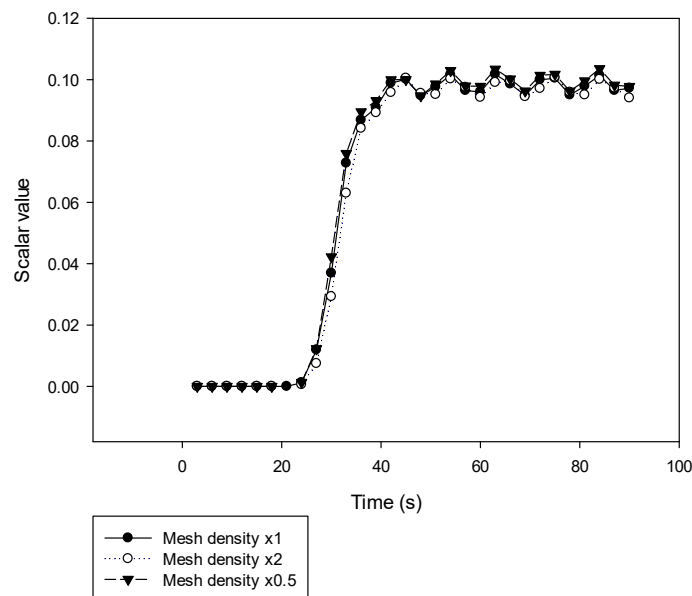

**Figure S1.** Comparison of the results for mesh densities equal to 0.5, 1 and 2 times the reference mesh density with the same mixing parameters ( $Q = 25 \text{ NmL} \cdot \text{min}^{-1}$  and  $t_A/(t_A + t_B) = 1/10$ ) at the exit of the 4th mixing stage.

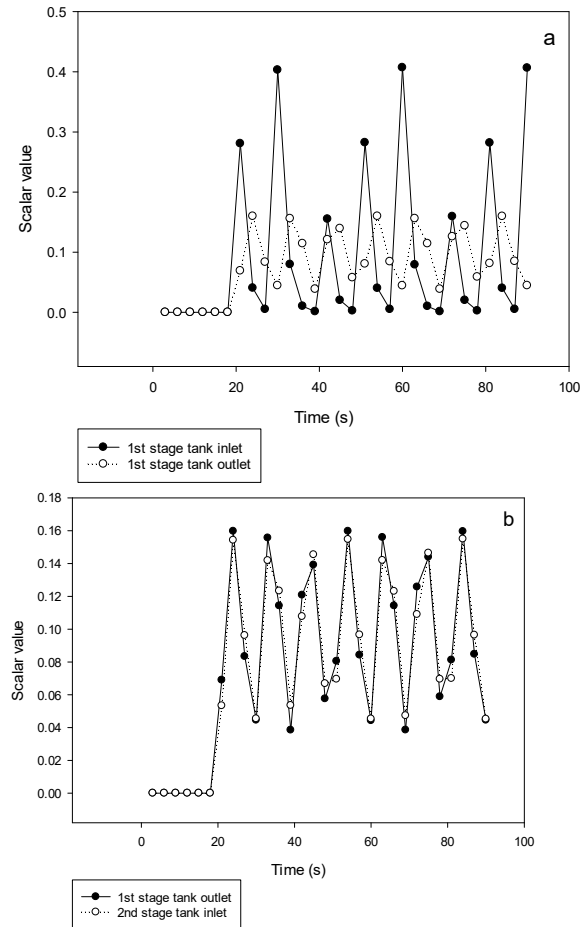

**Figure S2.** Scalar values variations with respect to time between the inlet and the outlet of a tank from the first stage (a) and between the outlet of this tank and the inlet of a tank from the second stage (b).

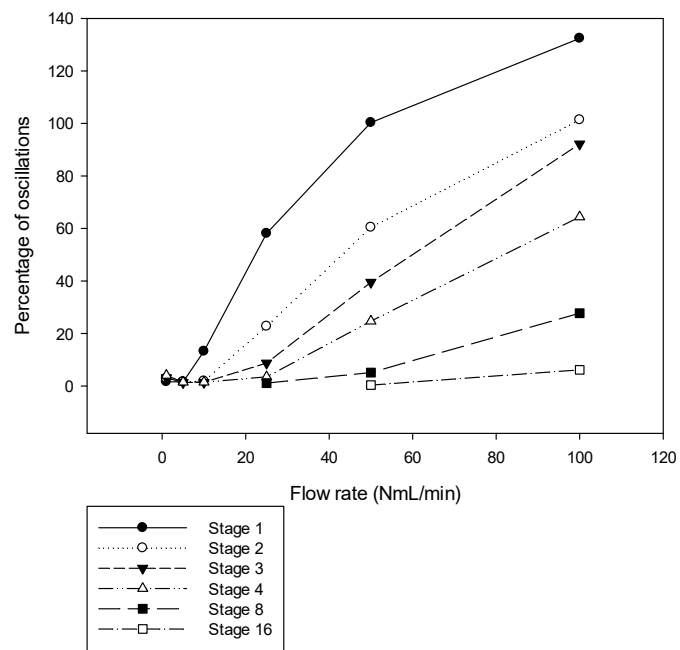

**Figure S3.** Scalar variations at the exit of different numbers of mixing stages with respect to the flow rate. The variations are presented as a +/- percentage of the targeted scalar 0.1.

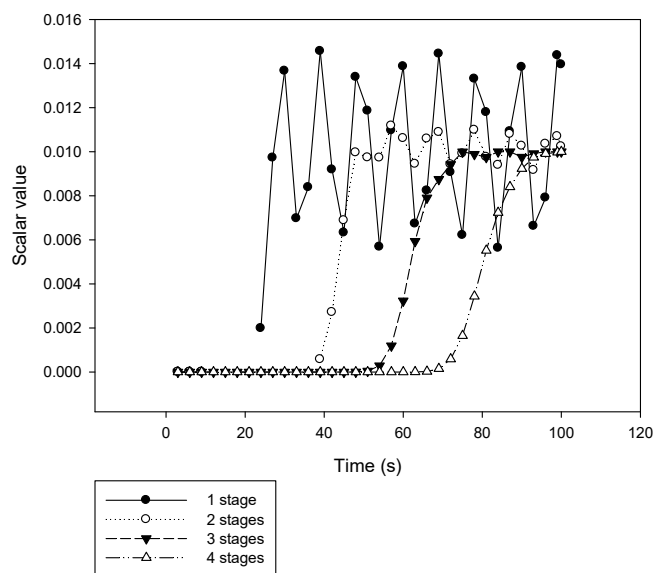

**Figure S4.** Scalar value after 1 to 4 stages at a flow rate of  $5 \text{ NmL} \cdot \text{min}^{-1}$  for a pulses ratio of 1/100.
